# Supplementary material for: How complete are our clerkings? A project aimed at improving the quality of medical records by using a standardised proforma
Source: PubMed Central journal article supplement — BMJ Qual Improv Rep. 2014 Feb 25;2(2):u203012.w1388. doi: 10.1136/bmjquality.u203012.w1388 (PMC4663836; doi:10.1136/bmjquality.u203012.w1388), 2014-02-25
Supplement: bmjqir-2-u203012-w1388-s1.pdf [file bmjqir-2-u203012-w1388-s1.pdf]

## Figures and Tables to Accompany "How Complete Are Our Clerkings? A clinical audit at a district general hospital in Kent."

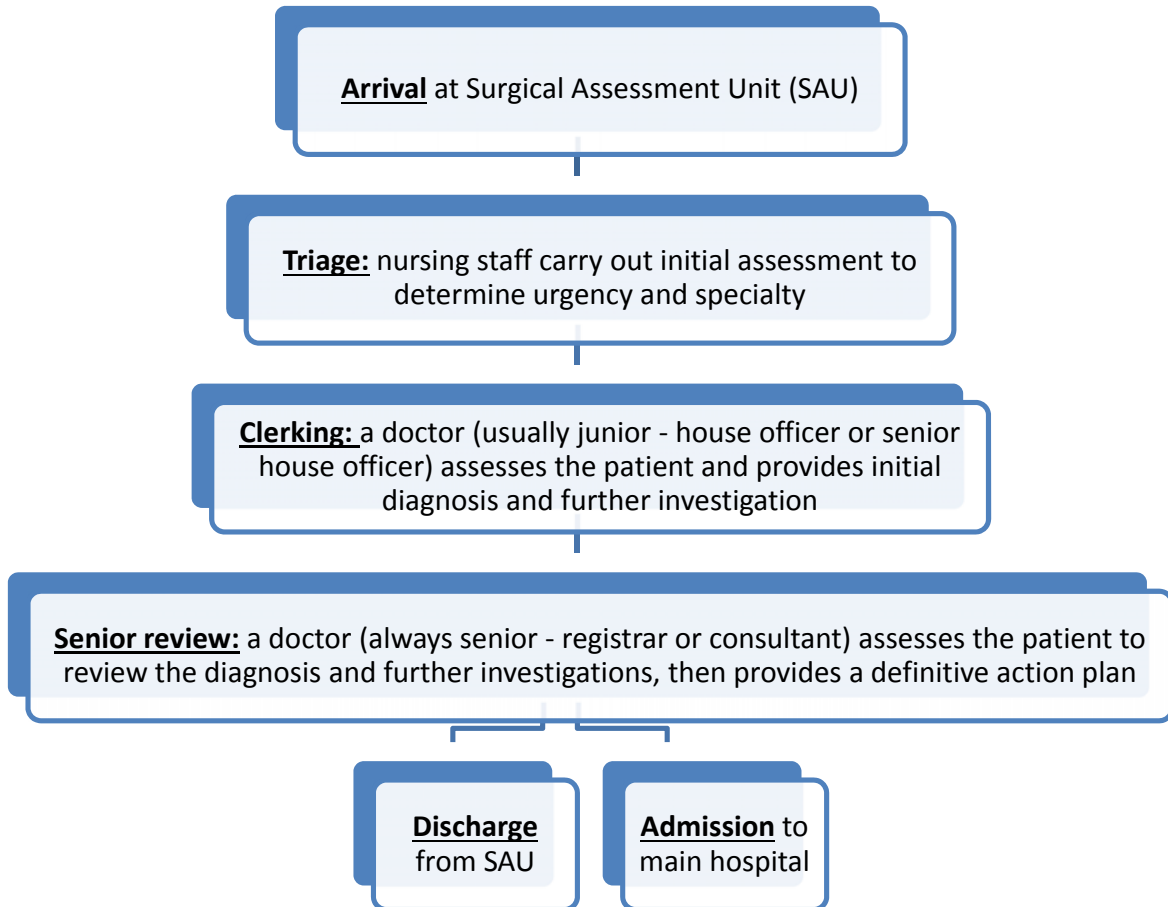

Figure 1: An example patient pathway through the surgical assessment unit

Table 1: Proportions of data recorded between cycles 1 and 2

|         | cycle        | N   | Mean |
|---------|--------------|-----|------|
| Allergy | First cycle  | 170 | .74  |
|         | Second cycle | 150 | .69  |
| Drug    | First cycle  | 170 | .76  |
|         | Second cycle | 150 | .88  |
| Doses   | First cycle  | 170 | .49  |
|         | Second cycle | 150 | .70  |
| Social  | First cycle  | 170 | .46  |
|         | Second cycle | 150 | .71  |
| NBM     | First cycle  | 170 | .58  |
|         | Second cycle | 150 | .74  |

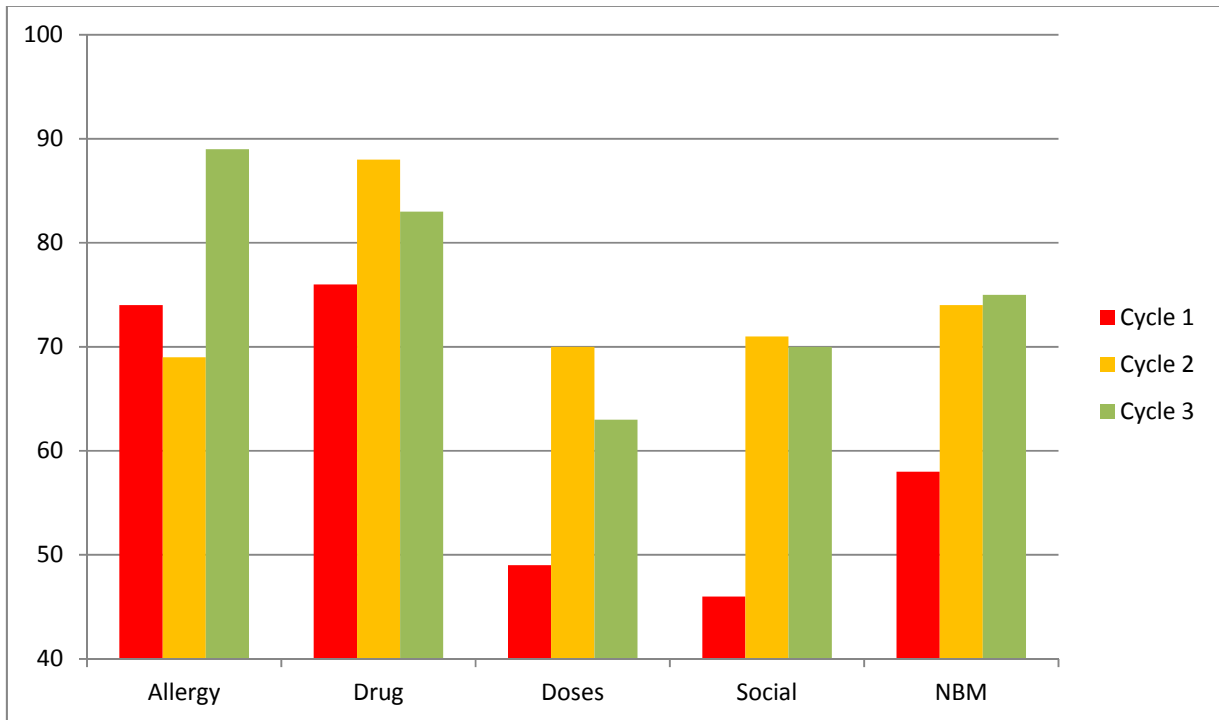

Figure 2: Proportions of data recorded during all cycles in graphical form

Table 2: Statistical significance of the differences in Table 1

| Cycle 1 to 2      |                                                 | Independent Samples Test |                             |                         |                             |                         |                             |                         |                             |                         |                             |
|-------------------|-------------------------------------------------|--------------------------|-----------------------------|-------------------------|-----------------------------|-------------------------|-----------------------------|-------------------------|-----------------------------|-------------------------|-----------------------------|
|                   |                                                 | Allergy                  |                             | Drug                    |                             | Doses                   |                             | Social                  |                             | NBM                     |                             |
|                   |                                                 | Equal variances assumed  | Equal variances not assumed | Equal variances assumed | Equal variances not assumed | Equal variances assumed | Equal variances not assumed | Equal variances assumed | Equal variances not assumed | Equal variances assumed | Equal variances not assumed |
| t                 |                                                 | 1.077                    | 1.073                       | -2.694                  | -2.738                      | -3.919                  | -3.941                      | -4.634                  | -4.662                      | -2.995                  | -3.017                      |
| df                |                                                 | 318                      | 307.693                     | 318                     | 312.049                     | 318                     | 317.516                     | 318                     | 317.752                     | 318                     | 317.976                     |
| t-test for        | Sig. (2-tailed)                                 | .282                     | .284                        | .007                    | .007                        | .000                    | .000                        | .000                    | .000                        | .003                    | .003                        |
| Equality of Means | Mean Difference                                 | .055                     | .055                        | -.115                   | -.115                       | -.212                   | -.212                       | -.249                   | -.249                       | -.158                   | -.158                       |
|                   | Std. Error Difference                           | .051                     | .051                        | .043                    | .042                        | .054                    | .054                        | .054                    | .053                        | .053                    | .052                        |
|                   | 95% Confidence Interval Lower of the Difference | -.045                    | -.045                       | -.200                   | -.198                       | -.318                   | -.317                       | -.354                   | -.354                       | -.261                   | -.260                       |
|                   | Upper                                           | .154                     | .154                        | -.031                   | -.032                       | -.105                   | -.106                       | -.143                   | -.144                       | -.054                   | -.055                       |

Table 3: Percentage of data recorded by grade of doctor in cycle 2

| Grade of doctor      | Percentage items recorded (number of clerkings) |
|----------------------|-------------------------------------------------|
| House officer        | 82.0% (48)                                      |
| Senior house officer | 78.6% (83)                                      |
| Registrar            | 36.8% (19)                                      |

Table 4: Proportions of data recorded between cycles 2 and 3

|         | cycle        | N   | Mean |
|---------|--------------|-----|------|
| Allergy | Second cycle | 150 | .69  |
|         | Third cycle  | 174 | .89  |
| Drug    | Second cycle | 150 | .88  |
|         | Third cycle  | 174 | .83  |
| Doses   | Second cycle | 150 | .70  |
|         | Third cycle  | 174 | .63  |
| Social  | Second cycle | 150 | .71  |
|         | Third cycle  | 174 | .70  |
| NBM     | Second cycle | 150 | .74  |
|         | Third cycle  | 174 | .75  |

Table 5: Statistical significance of the differences in Table 3

| Cycle 2 to 3      |                                           | Independent Samples Test |                             |                         |                             |                         |                             |                         |                             |                         |                             |
|-------------------|-------------------------------------------|--------------------------|-----------------------------|-------------------------|-----------------------------|-------------------------|-----------------------------|-------------------------|-----------------------------|-------------------------|-----------------------------|
|                   |                                           | Allergy                  |                             | Drug                    |                             | Doses                   |                             | Social                  |                             | NBM                     |                             |
|                   |                                           | Equal variances assumed  | Equal variances not assumed | Equal variances assumed | Equal variances not assumed | Equal variances assumed | Equal variances not assumed | Equal variances assumed | Equal variances not assumed | Equal variances assumed | Equal variances not assumed |
| t                 |                                           | -4.520                   | -4.401                      | 1.324                   | 1.338                       | 1.394                   | 1.400                       | .351                    | .352                        | -.146                   | -.146                       |
| df                |                                           | 322                      | 258.187                     | 322                     | 322.000                     | 322                     | 319.100                     | 322                     | 316.493                     | 322                     | 314.103                     |
| t-test for        | Sig. (2-tailed)                           | .000                     | .000                        | .187                    | .182                        | .164                    | .163                        | .725                    | .725                        | .884                    | .884                        |
| Equality of Means | Mean Difference                           | -.198                    | -.198                       | .052                    | .052                        | .074                    | .074                        | .018                    | .018                        | -.007                   | -.007                       |
|                   | Std. Error Difference                     | .044                     | .045                        | .040                    | .039                        | .053                    | .053                        | .051                    | .051                        | .049                    | .049                        |
|                   | 95% Confidence Interval of the Difference | Lower                    | Upper                       | Lower                   | Upper                       | Lower                   | Upper                       | Lower                   | Upper                       | Lower                   | Upper                       |
|                   |                                           | -.285                    | -.287                       | -.025                   | -.025                       | -.030                   | -.030                       | -.082                   | -.082                       | -.103                   | -.103                       |
|                   |                                           | -.112                    | -.110                       | .130                    | .129                        | .177                    | .177                        | .118                    | .118                        | .089                    | .089                        |
